# Supplementary material for: Synthesis and characteristics of biobased copolyester for thermal shrinkage film
Source: Royal Society of Chemistry journal article supplement (doi:10.1039/c6ra10333b), 2016-01-01
Supplement: c6ra10333b1.pdf [file c6ra10333b1.pdf]

The following supporting information shows the molecular weight value for esterification product

**Supporting information 1** Molecular weight of PCTG copolyester esterification product

| Sample Code <sup>a</sup> | Feed Ratio    | Composition Ratio(NMR) <sup>b</sup> | M <sub>n</sub> <sup>c</sup><br>(g/mol) | M <sub>w</sub> <sup>c</sup><br>(g/mol) | M <sub>w</sub> /M <sub>n</sub> |
|--------------------------|---------------|-------------------------------------|----------------------------------------|----------------------------------------|--------------------------------|
|                          | (EG/PDO/CHDM) | (EG/PDO/CHDM)                       |                                        |                                        |                                |
| PCTG00                   | 0 / 100 / 0   | 0 / 100 / 0                         | 396                                    | 543                                    | 1.44                           |
| PCTG10                   | 0 / 90 / 10   | 0 / 88.5 / 11.5                     | 402                                    | 576                                    | 1.42                           |
| PCTG20                   | 0 / 80 / 20   | 0 / 75.8 / 23.4                     | 420                                    | 592                                    | 1.42                           |
| PCTG30                   | 0 / 70 / 30   | 0 / 64.5 / 35.5                     | 433                                    | 615                                    | 1.43                           |

<sup>a</sup> Sample codes denote the feed ratio of CHDM to TPA

<sup>b</sup> The composition ratio was measured using the relative integrated area of the oxymethylene proton of each of the monomers

<sup>c</sup> Number- (M<sub>n</sub>) and weight-average (M<sub>w</sub>) molecular weights were determined by GPC.
